# Supplementary material for: The Potential Role of Stem Cells in Wound Healing: A Systematic Review
Source: Preprints.org preprint supplement (doi:10.20944/preprints202402.1023.v1), 2024-02-19
Supplement: Supplementary file 1 [file supplementary]

Archive with 2 entries (2 files):
- Appendix A and B/Appendix A.pdf
- Appendix A and B/Appendix B.pdf
