# Supplementary material for: The Potential Role of Stem Cells in Wound Healing: A Systematic Review
Source: Preprints.org preprint supplement (doi:10.20944/preprints202402.1023.v1), 2024-02-19
Supplement: Supplementary file 1 [file supplementary › Appendix A and B/Appendix B.pdf]

| author | Covidence # | Study                      | Title                                                                                                                  | Authors                                                                                                                                                                                                                                                            | Abstract           | Intervention                                                                                                                            | Allogenic/autologous          | Treatment / follow up time | Number of patients/groups                                                                                                                                                                                                                                                        | Patients/wound type                                                                                                          | Results                                                                                                                                                                                                 | Adverse events                        | Conclusion                                                                    | DOI                                                                       |
|--------|-------------|----------------------------|------------------------------------------------------------------------------------------------------------------------|--------------------------------------------------------------------------------------------------------------------------------------------------------------------------------------------------------------------------------------------------------------------|--------------------|-----------------------------------------------------------------------------------------------------------------------------------------|-------------------------------|----------------------------|----------------------------------------------------------------------------------------------------------------------------------------------------------------------------------------------------------------------------------------------------------------------------------|------------------------------------------------------------------------------------------------------------------------------|---------------------------------------------------------------------------------------------------------------------------------------------------------------------------------------------------------|---------------------------------------|-------------------------------------------------------------------------------|---------------------------------------------------------------------------|
| Banu   | #6358       | Renner 2009                | Transplantation of chronic wounds with epidermal sheets derived from autologous skin                                   | Renner, R.; Harth, W.; Simon, J. C.                                                                                                                                                                                                                                | nts with (n = 18   | Transplantation of tissue-engineered autologous epidermal sheets derived from outer root sheath (ORS) cells of patients' hair           | autologous                    | 12 weeks                   | 23 patients, including 18 with therapeutic improvement and 5 without improvement, were retrospectively analyzed. effect of a single transplantation in a                                                                                                                         | patients whose ulcers had not thrombosis                                                                                     | Responder patients (n = 18) showed a total wound reduction of 23%, while a subgroup of patients with ulcer area < 25 cm <sup>2</sup> (n = 12) exhibited a remarkable improvement of 64%. Complete wound | none                                  | Significant wound closure rate if wound area less than 5 cm <sup>2</sup>      | 10.1111/j.1742-481X.2009.00609.x                                          |
| Banu   | #152        | Raposo 2016                | Adipose-derived Stem Cells Added to Platelet-Rich Plasma for Chronic Skin Ulcer Therapy                                | Raposo, E.; Bertozzi, N.; Bonomini, S.; Bernuzzi, G.; Formentini, A.; Grignaffini, E.; Pio                                                                                                                                                                         | al or experimen    | Adipose-derived stem cells (ASCs) combined with platelet-rich plasma (PRP)                                                              | autologous                    | 18 months                  | Control Group: 24 patients with 31 chronic skin ulcers received standard wound care. Experimental Group: 16 patients with 21 chronic skin ulcers received standard wound                                                                                                         | Chronic skin ulcers                                                                                                          | Wound closure rates were significantly different between groups (P = 0.0257), with faster recovery (0.2287 cm x day) in the group receiving fibrin gel with ADSCs showed a greater reduction in wound   | none                                  | No difference in wound closure rate, however significant faster wound closure | PMID: 27071140.                                                           |
| Banu   | #296        | Mrozikiewicz-Rakowska 2023 | Allogenic Adipose-Derived Stem Cells in Diabetic Foot Ulcer Treatment: Clinical Effectiveness, Safety, and the time to | Mrozikiewicz-Rakowska, B.; Szabolowska-Gadomska, I.; Cysewski, D.; Rudziński, S.; Płoski, R.; Gasperowicz, P.;                                                                                                                                                     | and the time to    | Allogenic adipose-derived stem cells (ADSCs)                                                                                            | allogenic                     | 7 weeks                    | Participants were divided into two equal groups, with one group receiving fibrin gel with ADSCs, and the other receiving fibrin gel alone. 46 participants with diabetic foot ulcers, with 23 individuals in each                                                                | Chronic diabetic foot ulcers                                                                                                 | The group receiving fibrin gel with ADSCs showed a greater reduction in wound size at all time points, significantly on days 21 and 49.                                                                 | none                                  | The time to 50% reduction                                                     | 10.3390/jms24021472                                                       |
| Banu   | #1977       | Zhou 2022                  | Efficacy of Human Adipose Derived Mesenchymal Stem Cells in Promoting Skin                                             | Zhou, L.; Wang, H.; Yao, S.; Li, L.; Kuang, X.                                                                                                                                                                                                                     | 10 cm(2) of wo     | Human adipose derived mesenchymal stem cells                                                                                            | not clear                     | 10 days                    | 146 (human adipose derived mesenchymal stem cells for each 10 cm <sup>2</sup> of wound 150 (control group, saline). acute wounds (burns or crush wounds).                                                                                                                        | acute wounds (burns or crush wounds).                                                                                        | The rate of wound healing significantly increased (P=0.008). granulation tissue coverage rate and thickness of granulation tissue in experimental                                                       | none                                  | HAMSCs treatment cou                                                          | 10.1155/2022/6590025                                                      |
| Banu   | #1982       | Alinda 2023                | The efficacy of topical adipose mesenchymal stem cell-conditioned medium versus                                        | Alinda, M. D.; Christopher, P. M.; Listiawan, M. V.; Endaryanto, A.; Saroto, H.; Diantoro, E. A.;                                                                                                                                                                  | wo groups to reesc | reescenchymal stem cell conditioned m                                                                                                   | allogenic (amniotic membrane) | 8 weeks                    | Parallel designs in 22 subjects in each of the three treatment groups. The subjects were leprosy patients with chronic plantar ulcer of leprosy of >6 weeks, an ulcer depth of <0.5 cm, and a maximum intensity of 0 cm <sup>2</sup> who did                                     | Chronic plantar ulcer of leprosy                                                                                             | Wound closure was achieved in 17 of 20 lesions (9 lesions in the study group, 8 lesions in the control group).                                                                                          | none                                  | A better outcomes in gi                                                       | 10.25259/rjdv1.784.2021                                                   |
| Banu   | #3508       | Uzun 2021                  | Intralesional allogenic adipose-derived stem cells application in chronic diabetic foot                                | Uzun, E.; Güney, A.; Gönen, Z. B.; Özkul, Y.; Kafadar I. H.; Güney, M.; Mutlu, M.                                                                                                                                                                                  | ip duration was    | Intralesional injection of allogenic adipose-derived mesenchymal stem cells                                                             | allogenic                     | 43.4 +/- 8.7 months        | N = 20; chronic diabetic foot ulcers (12 male, 8 female).                                                                                                                                                                                                                        | Chronic diabetic foot ulcers                                                                                                 | Wound closure was achieved in 17 of 20 lesions (9 lesions in the study group, 8 lesions in the control group).                                                                                          | none                                  | Intralesional allogenic adipose-derived mesenchymal stem                      | 10.1016/j.fas.2020.08.002                                                 |
| Banu   | #3696       | Tarallo 2018               | Liposuction Aspirate Fluid Adipose-Derived Stem Cell Injection and Secondary Healing in Fingert Injury: A              | Tarallo, M.; Fino, P.; Ribuffo, D.; Casella, D.; Toscani, M.; Spalvieri, C.; Lattanzi, W.; Di Taranto, G.                                                                                                                                                          | ation and analy:   | Liposuction Aspirate Fluid Adipose-Derived Stem Cell Injection                                                                          | autologous                    | 6th and 12th months        | 40 consecutive patients with a fingertip injury were dichotomized into two groups: Group A (conservative approach) and B (treatment group). Group E (filtration of the liposupernatant in a closed device (MyStemEv) separation of LAF, which was then injected at injured site) | Digital ulcers in fingertip injuries                                                                                         | Treatment group achieved shorter time to complete wound closure (p<0.05), treatment arm greater aesthetics and disability outcome and lower pain                                                        | none                                  | The average number of days                                                    | 10.1097/rys.0000000000004506                                              |
| Banu   | #3748       | Cai 2023                   | Long-term follow-up and exploration of the mechanism of stromal vascular fraction gel in chronic wounds                | Cai, Y.; Zhang, F.; Feng, J.; Wu, B.; Li, H.; Xiao, S.; Lu, F.; Wei, Z.; Deng, C.                                                                                                                                                                                  | RESULTS: All       | Autologous stromal vascular fraction gel (SVF-gel) transplantation                                                                      | autologous                    | 2-6 years                  | 20 patients with chronic wounds treated with autologous SVF-gel transplantation from March 2016 to September 2019.                                                                                                                                                               | Chronic skin ulcers                                                                                                          | All patients achieved 100% wound closure, with an average time of 28.3 ± 9.7 days. The follow-up period ranged from 2 to 6 years, and no wound recurrence was observed. In vitro, SVF                   | none                                  | All patients had 100% w                                                       | 10.1186/s13287-023-03389-2                                                |
| Banu   | #4760       | Zollino 2019               | A phase II randomized clinical trial for the treatment of recalcitrant chronic leg                                     | Zollino, I.; Campioni, D.; Sibilla, M. G.; Tessari, M.; Malagò, A. M.; Zamboni, P.                                                                                                                                                                                 | rious immunop      | Centrifuged adipose tissue (CAT), along with debrided, advanced dressings, and compression.                                             | autologous                    | 24 weeks                   | 8 - experimental arm (receiving CAT treatment), 8-control arm (without CAT treatment)                                                                                                                                                                                            | Chronic venous leg ulcers                                                                                                    | arm (17.5 ± 7.0 weeks) compared to                                                                                                                                                                      | none                                  | Healing time was observed in the experimental                                 | 10.1016/j.jcyt.2018.10.012                                                |
| Banu   | #4922       | Moon 2019                  | Potential of Allogenic Adipose-Derived Stem Cell-Hydrogel Complex for Treating Diabetic                                | Moon, K. C.; Suh, H. S.; Kim, K. B.; Han, S. K.; Young, K. W.; Lee, J. W.; Kim, M. H.                                                                                                                                                                              | ane film was ap    | Allogenic adipose-derived stem cell (ASC) sheets. Allogenic ASC sheets or polyurethane film were applied weekly for up to 12            | allogenic                     | 12 weeks                   | Fifty-nine patients with diabetic foot ulcers were randomized, with 30 in the ASC treatment group and 29 in the control group.                                                                                                                                                   | for treating diabetic foot ulcers, comparing them to a control group treated with polyurethane                               | The treatment group showed a higher rate of complete wound closure, with 73% at week 8 and 82% at week 12, compared to 47% and 53% in the                                                               | none                                  | Complete wound closure                                                        | 10.2337/db18-0699                                                         |
| Banu   | #6289       | Stessuk 2020               | A topical cell therapy approach for diabetic chronic ulcers: Effects of mesenchymal stromal cells associated with      | Stessuk, T.; Ribeiro-Paes, J. T.; Colpas, P. T.; Martins Alves, P. C.; Rehder, J.; Boscardo, C. A. F.; Guillaumon, A. T.;                                                                                                                                          |                    | Biomembrane composed of autologous mesenchymal stromal cells (MSCs) and platelet-rich plasma (PRP)                                      | autologous                    | 90 days                    | Six diabetic patients with chronic wounds lasting more than 6 months were included in the study. Each patient underwent adipose tissue collection for MSC isolation and blood collection for PR preparation. The                                                                 | for treating chronic wounds in diabetic patients.                                                                            | granulation tissue formation began 7 days after the application of the biomembrane. Among the treated lesions, 5 out of 9 achieved total                                                                | none                                  | There was granulation tissue formation starting from 7 days after topical     | 10.1111/jocd.13321                                                        |
| Banu   | #6398       | Carstens 2021              | Treatment of chronic diabetic foot ulcers with adipose-derived stromal vascular fraction cell                          | Carstens, M. H.; Quintana, F. J.; Calderwood, S. T.; Sevilla, J. P.; Rios, A. B.; Rivera, C. M.; Calero, D.                                                                                                                                                        | er closure. Dog    | Local injections of autologous adipose derived stromal vascular fraction (SVF) cells. The SVF cells,                                    | autologous                    | 12 months                  | 63 patients with type 2 diabetes who had chronic DFUs and were considered candidates for amputation.                                                                                                                                                                             | Chronic diabetic foot ulcers                                                                                                 | Ulcer Closure: At 6 months, 51 subjects had 100% DFU closure, and 8 subjects had                                                                                                                        | none                                  | t SVF can be safely use                                                       | 10.1002/sectm.20-0497                                                     |
| Banu   | #6404       | Han 2010                   | The treatment of diabetic foot ulcers with uncultured, processed                                                       | Han, S. K.; Kim, H. R.; Kim, W. K.                                                                                                                                                                                                                                 | lete healing and   | Uncultured processed liposupernatant (PLA) cell autografts                                                                              | autologous                    |                            | 26 - PLA cell treatment group), 26 - control group                                                                                                                                                                                                                               | Chronic diabetic foot ulcers                                                                                                 | 100% of PLA cell-treated group achieved complete healing, compared to 62% in the control group. PLA cell healing rate 34.55% ± 11.18% vs.                                                               | none                                  | Uncultured PLA cell autografts demonstrated                                   | 10.1111/j.1524-475X.2010.00593.x                                          |
| Banu   | #6406       | Deng 2018                  | Treatment of human chronic wounds with autologous extracellular matrix/stromal vascular fraction gel: A                | Deng, C.; Wang, L.; Feng, J.; Lu, F.                                                                                                                                                                                                                               | he positive cont   | Autologous extracellular matrix/stromal vascular fraction gel                                                                           | autologous                    | 2 weeks                    | 10 (ECM/SVF gel) vs. 10 (NPWT)                                                                                                                                                                                                                                                   | Chronic skin ulcers - 9 venous stasis ulcers, 5 traumatic infections, 3 diabetic ulcers, 2 sarcoid ulcers, and 1 sarcoidosis | healing rate 34.55% ± 11.18% vs. 10.16% ± 2.67% ECM/SVF gel can exert a therapeutic effect on human chronic wounds, attributed to a favorable immunomodulatory effect,                                  | none                                  | ECM/SVF gel can exert                                                         | 10.1097/md.00000000000011667                                              |
| Banu   | #7688       | Khalil 2017                | Autologous adipose-derived mesenchymal stem cells embedded in platelet-rich fibrin for skin tissue regeneration        | Khalil, C.; Azar, A.; Salameh, R.; Ibrahim, A.; Del Papa, N.; Di Luca, G.; Sambataro, D.; Zaccara, E.; Magliocca, W.; Gabrielli, A.; Fraticelli, P.; Moroncini, G.; Baretta, L.; Nilforoushzhadeh, M.A.; Sissak, M.M.; Amirkhani, M.A.; Seifalian, A.M.; Banafsheh | Maximum surfa      | Conventional treatment with autologous adipose-derived mesenchymal stem cells (ADMSC) embedded in platelet-rich fibrin (PRF) along with | autologous                    | 8 weeks                    | 10 patients with open diabetic foot ulcers (DFU). Group A: PRF alone. Group B: ADMSC embedded in PRF.                                                                                                                                                                            | Chronic diabetic foot ulcers                                                                                                 | Healing index comparison between Group A and Group B. Promising results observed in Group B, indicating improved healing.                                                                               | none                                  | mesenchymal stem cell                                                         | doi: 10.4236/ojrm.2021.102002 (https://doi.org/10.4236/ojrm.2021.102002). |
| Banu   | #8123       | DelPapa 2014               | Regional implantation of adipose tissue-derived cells induces a prompt healing of long-lasting isolog digital          | DelPapa, N.; Di Luca, G.; Sambataro, D.; Zaccara, E.; Magliocca, W.; Gabrielli, A.; Fraticelli, P.; Moroncini, G.; Baretta, L.; Nilforoushzhadeh, M.A.; Sissak, M.M.; Amirkhani, M.A.; Seifalian, A.M.; Banafsheh                                                  | centrifugation:    | ADSC fractions, separated by centrifugation                                                                                             | autologous                    | 6 months                   | Fifteen patients with SSc having a long-lasting DU in only one fingertip who were unresponsive to intensive systemic and local treatment were enrolled in the study. The grafting procedure consisted of the injection, at the basis of the                                      | Chronic digital ulcers in the setting of CREST/systemic sclerosis                                                            | All ulcers healed. The mean time to healing of the cardinal ulcer was 4.23 weeks (range 2-7). The result was maintained during the following 6-month period, and no new DU                              | none                                  | autologous ADSCs led healing to treatment resistant ulcers in                 | 10.1002/art.38914                                                         |
| Banu   | #9712       | Nilforoushzhadeh 2020      | Engineered skin graft with stromal vascular fraction cells encapsulated in fibrin-                                     | Nilforoushzhadeh, M.A.; Sissak, M.M.; Amirkhani, M.A.; Seifalian, A.M.; Banafsheh                                                                                                                                                                                  | and biometric i    | Prevascularized skin grafts containing dermal and epidermal layers, utilizing the adipose stromal                                       | autologous                    |                            | The intervention group consisted of five human subjects with diabetic wounds, receiving prevascularized hydrogel skin grafts. The control group comprised                                                                                                                        |                                                                                                                              | hydrogel for biological compatibility and cell proliferation, migration, and vitality. The prevascularized hydrogel, when                                                                               | none                                  | Mesenchymal stem cell                                                         | 10.1002/term.3003                                                         |
| Banu   | #12336      | Luo 2014                   | The effect of conditioned media of adipose-derived stem cells on wound healing                                         | Luo, D.; Zhang, J.; Zhou, B.                                                                                                                                                                                                                                       | stations and mR    | Nineteen subjects were treated with Fx                                                                                                  | autologous                    | 3 weeks                    | ADSC-CM was topically applied onto FxCR-treated sites of one randomly selected arm for one hour, while FBS free DMEM medium was applied to FxCR-treated sites of the other arm. The dermatological changes: the index of erythema, melanin, TEWL, and elasticity were measured   | Wound after fraxel laser                                                                                                     | The mRNA expression of type III procollagen in ADSC-C                                                                                                                                                   | none                                  | Application of allograft ADSC                                                 | 10.1038/jid.2014.109                                                      |
| Katie  | #412        | Kmieciak 2021              | Antlerogenic stem cells extract accelerate                                                                             | Kmieciak, J.; Kulus, M. J.; Popiel, J.; Ciekiera, A.;                                                                                                                                                                                                              | bsolute values (   | Sonicated Antlerogenic Stem Cells (ASC) extract                                                                                         | Autologous                    |                            | 20 dermatological patients with venous leg ulcers Divided into two groups: one treated with ASC                                                                                                                                                                                  | Chronic venous leg ulcers                                                                                                    | Ki-67 expression and all tested wound healing parameters (including relative                                                                                                                            |                                       |                                                                               | 10.1186/s12906-021-03336-9                                                |
| Katie  | #1802       | Kim 2020                   | The effect of human umbilical cord blood-derived mesenchymal stem cell media                                           | Kim, J.; Kim, B.; Kim, S.; Lee, Y. I.; Kim, J.; Lee, J. H.                                                                                                                                                                                                         | without stem cel   | human umbilical cord blood-derived mesenchymal stem cell media containing serum                                                         |                               |                            | 23                                                                                                                                                                                                                                                                               | Laser treatment                                                                                                              |                                                                                                                                                                                                         |                                       |                                                                               | 10.1111/jocd.13063                                                        |
| Katie  | #1860       | Tan 2023                   | Effectiveness of Secretome from Human                                                                                  | Tan, S. T.; Aisyah, P. B.; Firmansyah, Y.; Nathasia, L.; Lavery, L. A.; Fulmer, J.; Shebelka, K. A.; Regulski, M.; Vayser, D.; Fried, D.;                                                                                                                          | is the side effect | Topical application of 10% secretome of human umbilical cord                                                                            |                               |                            | Forty-one patients with chronic ulcers, including diabetic ulcers and Hansen's                                                                                                                                                                                                   | Chronic Wounds (Diabetic and Trophic                                                                                         | Patients with chronic ulcers showed significant improvement in ulcer length,                                                                                                                            |                                       | Topical application of 10% SM-                                                | 10.2147/jmdh.S408162                                                      |
| Katie  | #1963       | Lavery 2014                | The efficacy and safety of Grafix® for the treatment of chronic                                                        | Lavery, L. A.; Fulmer, J.; Shebelka, K. A.; Regulski, M.; Vayser, D.; Fried, D.;                                                                                                                                                                                   | ontrols (P = 0.0   | Grafix® a human viable wound matrix (hVWM)                                                                                              |                               |                            | The participants were individuals with diabetic foot ulcers, with 50 patients in the Grafix group and 47 patients in the standard wound                                                                                                                                          | Chronic diabetic foot ulcers                                                                                                 | Proportion of Patients with Complete Wound Closure by 12 Weeks. The proportion of patients achieving                                                                                                    | Adverse Events: Fewer Grafix patients |                                                                               | 10.1111/rwj.12329                                                         |
